# Supplementary material for: Design of silk–vaterite microsphere systems as drug carriers with pH-responsive release behavior
Source: Royal Society of Chemistry journal article supplement (doi:10.1039/c5tb01692d), 2015-01-01
Supplement: c5tb01692d1.pdf [file c5tb01692d1.pdf]

## Supporting Information

### Design of Silk-Vaterite Microsphere Systems as Drug Carriers with pH-responsive Release Behavior

*Shanshan Liu<sup>a,b</sup>, Lijie Liu<sup>a,b,#</sup>, Liying Xiao<sup>a,b</sup>, Qiang Lu<sup>a,b,\*</sup>, Hesun Zhu<sup>c</sup>, David L Kaplan<sup>a,d</sup>*

<sup>a</sup>National Engineering Laboratory for Modern Silk & Collaborative Innovation Center of Suzhou Nano Science and Technology, Soochow University, Suzhou 215123, People's Republic of China

<sup>b</sup>College of Textile and Clothing Engineering, Soochow University, Suzhou 215123, People's Republic of China

<sup>c</sup>Research Center of Materials Science, Beijing Institute of Technology, Beijing100081, People's Republic of China

<sup>d</sup> Department of Biomedical Engineering, Tufts University, Medford, MA02155, USA

#The author has the same contribution with the first author

Corresponding author:

\*Qiang Lu, Tel: (+86)-512-67061649; E-mail: Lvqiang78@suda.edu.cn

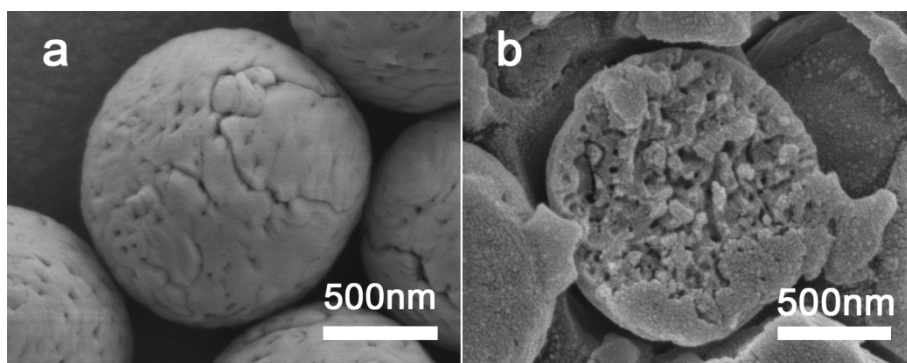

**Figure S1.** Morphological changes of silk-vaterite microspheres after treatment at 350°C for 6 h: (a) Surface images of the treated microspheres and (b) Cross-section images of the treated microspheres. Significant fusion of vaterite nanoparticles was observed after the treatment.

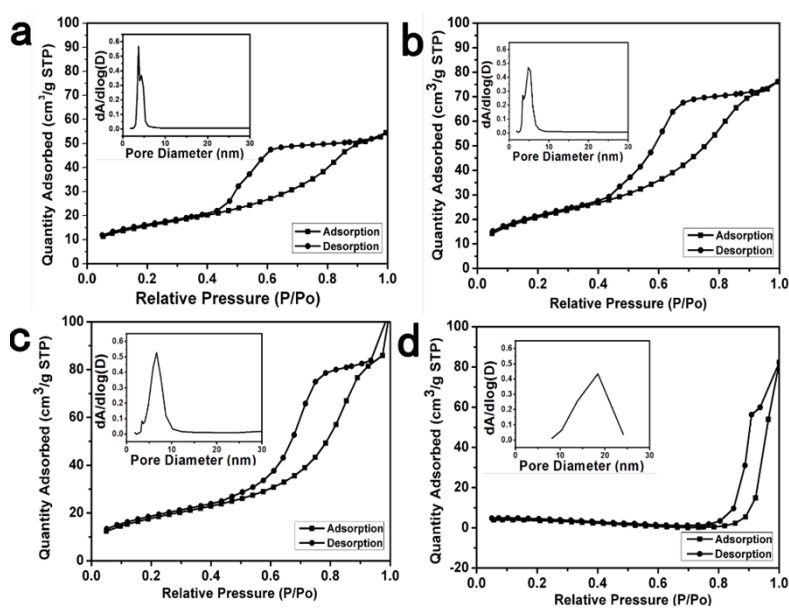

**Figure S2.** Nitrogen adsorption-desorption of silk-vaterite microspheres after the different thermal treatments. The samples were as follows: (a) M-0; (b) M-300; (c) M-305; and (d) M-310. The pore size increased while the surface area of the microspheres increased and then decreased following the increase of treatment temperature and time.

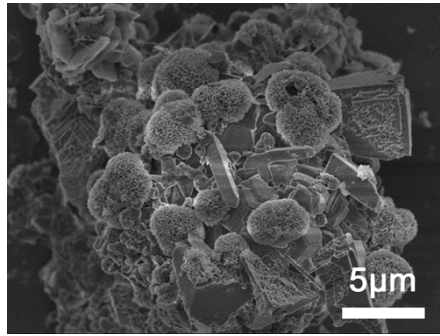

**Figure S3.** Typical microstructures of DOX-loaded silk-vaterite microspheres when the loaded DOX released in PBS solution for 8 days. The vaterite-calcite/hydroxyapatite transition appeared in the drug-release process.
